# Supplementary material for: Hepatitis C virus seroprevalence, testing, and treatment capacity in public health facilities in Ghana, 2016–2021; A multi-centre cross-sectional study
Source: PubMed Central journal article supplement (PMC10289322; doi:10.1371/journal.pone.0287580), 2023-06-23
Supplement: pone.0287580.s001.pdf [file pone.0287580.s001.pdf]

# PLOS ONE

## Hepatitis C virus seroprevalence, testing, and treatment capacity in public health facilities in Ghana, 2016 – 2021; A multi-centre cross-sectional study.

--Manuscript Draft--

|                              |                                                                                                                                                                                                                                                                                                                                                                                                                                                                                                                                                                                                                                                                                                                                                                                                                                                                                                                                                                                                                                                                                                                                                                                                                                                                                                                                                                                                                                                                                                                                                                                                                                                                                                                                                                                                                                                                                                                                                                                                  |
|------------------------------|--------------------------------------------------------------------------------------------------------------------------------------------------------------------------------------------------------------------------------------------------------------------------------------------------------------------------------------------------------------------------------------------------------------------------------------------------------------------------------------------------------------------------------------------------------------------------------------------------------------------------------------------------------------------------------------------------------------------------------------------------------------------------------------------------------------------------------------------------------------------------------------------------------------------------------------------------------------------------------------------------------------------------------------------------------------------------------------------------------------------------------------------------------------------------------------------------------------------------------------------------------------------------------------------------------------------------------------------------------------------------------------------------------------------------------------------------------------------------------------------------------------------------------------------------------------------------------------------------------------------------------------------------------------------------------------------------------------------------------------------------------------------------------------------------------------------------------------------------------------------------------------------------------------------------------------------------------------------------------------------------|
| <b>Manuscript Number:</b>    | PONE-D-23-08352                                                                                                                                                                                                                                                                                                                                                                                                                                                                                                                                                                                                                                                                                                                                                                                                                                                                                                                                                                                                                                                                                                                                                                                                                                                                                                                                                                                                                                                                                                                                                                                                                                                                                                                                                                                                                                                                                                                                                                                  |
| <b>Article Type:</b>         | Research Article                                                                                                                                                                                                                                                                                                                                                                                                                                                                                                                                                                                                                                                                                                                                                                                                                                                                                                                                                                                                                                                                                                                                                                                                                                                                                                                                                                                                                                                                                                                                                                                                                                                                                                                                                                                                                                                                                                                                                                                 |
| <b>Full Title:</b>           | Hepatitis C virus seroprevalence, testing, and treatment capacity in public health facilities in Ghana, 2016 – 2021; A multi-centre cross-sectional study.                                                                                                                                                                                                                                                                                                                                                                                                                                                                                                                                                                                                                                                                                                                                                                                                                                                                                                                                                                                                                                                                                                                                                                                                                                                                                                                                                                                                                                                                                                                                                                                                                                                                                                                                                                                                                                       |
| <b>Short Title:</b>          | Hepatitis C seroprevalence, testing, and treatment capacity in Ghana                                                                                                                                                                                                                                                                                                                                                                                                                                                                                                                                                                                                                                                                                                                                                                                                                                                                                                                                                                                                                                                                                                                                                                                                                                                                                                                                                                                                                                                                                                                                                                                                                                                                                                                                                                                                                                                                                                                             |
| <b>Corresponding Author:</b> | Yvonne Ayerki Nartey, MBChB PhD<br>University of Cape Coast School of Medical Sciences<br>GHANA                                                                                                                                                                                                                                                                                                                                                                                                                                                                                                                                                                                                                                                                                                                                                                                                                                                                                                                                                                                                                                                                                                                                                                                                                                                                                                                                                                                                                                                                                                                                                                                                                                                                                                                                                                                                                                                                                                  |
| <b>Keywords:</b>             | Hepatitis C virus; anti-HCV; viral hepatitis; children; Adolescents; Ghana; sub-Saharan Africa                                                                                                                                                                                                                                                                                                                                                                                                                                                                                                                                                                                                                                                                                                                                                                                                                                                                                                                                                                                                                                                                                                                                                                                                                                                                                                                                                                                                                                                                                                                                                                                                                                                                                                                                                                                                                                                                                                   |
| <b>Abstract:</b>             | <p>The current burden of Hepatitis C virus infection and the availability of HCV-related services in Ghana are not well described. Previous estimates on HCV seroprevalence in the country are outdated. This study investigated the HCV seroprevalence and testing and treatment capacity in Ghana. A multi-centre cross-sectional study was conducted in which laboratory and blood bank registers from 17 public healthcare institutions in Ghana were reviewed. A survey on cost and availability of HCV-related testing and treatment was also performed. Crude and pooled estimates of HCV seroprevalence, frequency and median cost of available diagnostic tests and medicines were described. The crude HCV seroprevalence was 2.62% (95% CI 2.53 – 2.72) and the pooled estimate was 4.58% (95% CI 4.06 – 5.11) among 103,609 persons tested in laboratories. Age (OR 1.02 95% CI 1.01 – 1.02) and male sex (OR 1.26 95% CI 1.08 – 1.48) were predictors of a positive anti-HCV RDT test. Northern administrative regions in Ghana had the highest HCV seroprevalence ranging from 8.3 – 14.4%. Among 55, 458 potential blood donors, crude HCV seroprevalence was 3.57% (95% CI 3.42 – 3.72). Testing was through Rapid Diagnostic Test (RDT) kits in most facilities, and only 2 of 17 centres were performing HCV RNA testing. The median cost of an anti-HCV RDT test was \$0.97 (0-1.61) and \$3.23 (1.61 – 7.58) for persons with and without government health insurance respectively. The median cost of a 12-week course of the pan-genotypic direct-acting antiviral therapy sofosbuvir-daclatasvir was \$887.70. In conclusion, there are significant regional differences in HCV burden across Ghana. Limited access to and cost of HCV RNA and DAA therapy hinders testing and treatment capability, and consequently HCV elimination efforts. A national HCV program supported with a sustainable financing plan is required to accelerate HCV elimination in Ghana.</p> |
| <b>Order of Authors:</b>     | <p>Yvonne Ayerki Nartey, MBChB PhD</p> <p>Rafiq Okine</p> <p>Atsu Seake-Kwawu</p> <p>Georgia Ghartey</p> <p>Yaw Karikari Asamoah</p> <p>Ampem Darko Jnr Siaw</p> <p>Kafui Senya</p> <p>Amoako Duah</p> <p>Alex Owusu-Ofori</p> <p>Opei Adarkwa</p> <p>Seth Agyeman</p> <p>Sally Afua Bampoh</p>                                                                                                                                                                                                                                                                                                                                                                                                                                                                                                                                                                                                                                                                                                                                                                                                                                                                                                                                                                                                                                                                                                                                                                                                                                                                                                                                                                                                                                                                                                                                                                                                                                                                                                  |

|                                                                                                                                                                                                                                                                                                                                                                                                                                                                                                                                                                                                                                                                                                                                                                                                                                                                                                                                                                                                                                                                                                                                                                                                                                                                                                                                                                                     |                                                                                                                                                                                                                                                                                                                                                             |
|-------------------------------------------------------------------------------------------------------------------------------------------------------------------------------------------------------------------------------------------------------------------------------------------------------------------------------------------------------------------------------------------------------------------------------------------------------------------------------------------------------------------------------------------------------------------------------------------------------------------------------------------------------------------------------------------------------------------------------------------------------------------------------------------------------------------------------------------------------------------------------------------------------------------------------------------------------------------------------------------------------------------------------------------------------------------------------------------------------------------------------------------------------------------------------------------------------------------------------------------------------------------------------------------------------------------------------------------------------------------------------------|-------------------------------------------------------------------------------------------------------------------------------------------------------------------------------------------------------------------------------------------------------------------------------------------------------------------------------------------------------------|
|                                                                                                                                                                                                                                                                                                                                                                                                                                                                                                                                                                                                                                                                                                                                                                                                                                                                                                                                                                                                                                                                                                                                                                                                                                                                                                                                                                                     | Lindsey Hiebert                                                                                                                                                                                                                                                                                                                                             |
|                                                                                                                                                                                                                                                                                                                                                                                                                                                                                                                                                                                                                                                                                                                                                                                                                                                                                                                                                                                                                                                                                                                                                                                                                                                                                                                                                                                     | Henry Njuguna                                                                                                                                                                                                                                                                                                                                               |
|                                                                                                                                                                                                                                                                                                                                                                                                                                                                                                                                                                                                                                                                                                                                                                                                                                                                                                                                                                                                                                                                                                                                                                                                                                                                                                                                                                                     | Neil Gupta                                                                                                                                                                                                                                                                                                                                                  |
|                                                                                                                                                                                                                                                                                                                                                                                                                                                                                                                                                                                                                                                                                                                                                                                                                                                                                                                                                                                                                                                                                                                                                                                                                                                                                                                                                                                     | John W. Ward                                                                                                                                                                                                                                                                                                                                                |
|                                                                                                                                                                                                                                                                                                                                                                                                                                                                                                                                                                                                                                                                                                                                                                                                                                                                                                                                                                                                                                                                                                                                                                                                                                                                                                                                                                                     | Lewis Rowland Roberts                                                                                                                                                                                                                                                                                                                                       |
|                                                                                                                                                                                                                                                                                                                                                                                                                                                                                                                                                                                                                                                                                                                                                                                                                                                                                                                                                                                                                                                                                                                                                                                                                                                                                                                                                                                     | Ansumana Sandy Bockarie                                                                                                                                                                                                                                                                                                                                     |
|                                                                                                                                                                                                                                                                                                                                                                                                                                                                                                                                                                                                                                                                                                                                                                                                                                                                                                                                                                                                                                                                                                                                                                                                                                                                                                                                                                                     | Yaw Asante Awuku                                                                                                                                                                                                                                                                                                                                            |
|                                                                                                                                                                                                                                                                                                                                                                                                                                                                                                                                                                                                                                                                                                                                                                                                                                                                                                                                                                                                                                                                                                                                                                                                                                                                                                                                                                                     | Dorcas Obiri-Yeboah                                                                                                                                                                                                                                                                                                                                         |
| <b>Additional Information:</b>                                                                                                                                                                                                                                                                                                                                                                                                                                                                                                                                                                                                                                                                                                                                                                                                                                                                                                                                                                                                                                                                                                                                                                                                                                                                                                                                                      |                                                                                                                                                                                                                                                                                                                                                             |
| <b>Question</b>                                                                                                                                                                                                                                                                                                                                                                                                                                                                                                                                                                                                                                                                                                                                                                                                                                                                                                                                                                                                                                                                                                                                                                                                                                                                                                                                                                     | <b>Response</b>                                                                                                                                                                                                                                                                                                                                             |
| <p><b>Financial Disclosure</b></p> <p>Enter a financial disclosure statement that describes the sources of funding for the work included in this submission. Review the <a href="#">submission guidelines</a> for detailed requirements. View published research articles from <a href="#">PLOS ONE</a> for specific examples.</p> <p>This statement is required for submission and <b>will appear in the published article</b> if the submission is accepted. Please make sure it is accurate.</p> <p><b>Unfunded studies</b><br/>Enter: <i>The author(s) received no specific funding for this work.</i></p> <p><b>Funded studies</b><br/>Enter a statement with the following details:</p> <ul style="list-style-type: none"> <li>• Initials of the authors who received each award</li> <li>• Grant numbers awarded to each author</li> <li>• The full name of each funder</li> <li>• URL of each funder website</li> <li>• Did the sponsors or funders play any role in the study design, data collection and analysis, decision to publish, or preparation of the manuscript?</li> <li>• <b>NO</b> - Include this sentence at the end of your statement: <i>The funders had no role in study design, data collection and analysis, decision to publish, or preparation of the manuscript.</i></li> <li>• <b>YES</b> - Specify the role(s) played.</li> </ul> <p>* typeset</p> | <p>Authors YAN, GG and YKA received partial funding. Funding agency: Coalition for Global Hepatitis Elimination at the Task Force for Global Health (<a href="https://www.globalhep.org/">https://www.globalhep.org/</a>). The funders had no role in study design, data collection and analysis, decision to publish, or preparation of the manuscript</p> |
| <b>Competing Interests</b>                                                                                                                                                                                                                                                                                                                                                                                                                                                                                                                                                                                                                                                                                                                                                                                                                                                                                                                                                                                                                                                                                                                                                                                                                                                                                                                                                          | The authors have declared that no competing interests exist.                                                                                                                                                                                                                                                                                                |

Use the instructions below to enter a competing interest statement for this submission. On behalf of all authors, disclose any [competing interests](#) that could be perceived to bias this work—acknowledging all financial support and any other relevant financial or non-financial competing interests.

This statement is **required** for submission and **will appear in the published article** if the submission is accepted. Please make sure it is accurate and that any funding sources listed in your Funding Information later in the submission form are also declared in your Financial Disclosure statement.

View published research articles from [PLOS ONE](#) for specific examples.

#### **NO authors have competing interests**

Enter: *The authors have declared that no competing interests exist.*

#### **Authors with competing interests**

Enter competing interest details beginning with this statement:

*I have read the journal's policy and the authors of this manuscript have the following competing interests: [insert competing interests here]*

\* typeset

#### **Ethics Statement**

Enter an ethics statement for this submission. This statement is required if the study involved:

- Human participants
- Human specimens or tissue
- Vertebrate animals or cephalopods
- Vertebrate embryos or tissues

No identifiable patient information was obtained, no patient enrolment for primary data was needed, and no informed consent from patients was required. Therefore, an exemption from requiring informed consent was granted by the Ghana Health Service Ethical Review Committee, Komfo-Anokye Teaching Hospital Institutional Review Board, Cape Coast Teaching Hospital Ethics Review Committee and Korle Bu Teaching Hospital Institutional Review Board. All methods were carried out in accordance with relevant guidelines and regulations. The study was approved by the ethical review committees of the Ghana Health Service (ERC number GHS-ERC 002/10/20), Korle Bu Teaching Hospital (KBTH-STC 00083/2021), Komfo-Anokye Teaching Hospital (KATH IRB/AP/099/21) and the Cape Coast Teaching Hospital

- Field research

(CCTHERC/EC/2021/117).

Write "N/A" if the submission does not require an ethics statement.

General guidance is provided below.

Consult the [submission guidelines](#) for detailed instructions. **Make sure that all information entered here is included in the Methods section of the manuscript.**

**Format for specific study types**

**Human Subject Research (involving human participants and/or tissue)**

- Give the name of the institutional review board or ethics committee that approved the study
- Include the approval number and/or a statement indicating approval of this research
- Indicate the form of consent obtained (written/oral) or the reason that consent was not obtained (e.g. the data were analyzed anonymously)

**Animal Research (involving vertebrate animals, embryos or tissues)**

- Provide the name of the Institutional Animal Care and Use Committee (IACUC) or other relevant ethics board that reviewed the study protocol, and indicate whether they approved this research or granted a formal waiver of ethical approval
- Include an approval number if one was obtained
- If the study involved *non-human primates*, add *additional details* about animal welfare and steps taken to ameliorate suffering
- If anesthesia, euthanasia, or any kind of animal sacrifice is part of the study, include briefly which substances and/or methods were applied

**Field Research**

Include the following details if this study involves the collection of plant, animal, or other materials from a natural setting:

- Field permit number
- Name of the institution or relevant body that granted permission

**Data Availability**

Authors are required to make all data underlying the findings described fully available, without restriction, and from the time of publication. PLOS allows rare exceptions to address legal and ethical concerns. See the [PLOS Data Policy](#) and [FAQ](#) for detailed information.

Yes - all data are fully available without restriction

A Data Availability Statement describing where the data can be found is required at submission. Your answers to this question constitute the Data Availability Statement and **will be published in the article**, if accepted.

**Important:** Stating 'data available on request from the author' is not sufficient. If your data are only available upon request, select 'No' for the first question and explain your exceptional situation in the text box.

Do the authors confirm that all data underlying the findings described in their manuscript are fully available without restriction?

**Describe where the data may be found in full sentences. If you are copying our sample text, replace any instances of XXX with the appropriate details.**

- If the data are **held or will be held in a public repository**, include URLs, accession numbers or DOIs. If this information will only be available after acceptance, indicate this by ticking the box below. For example: *All XXX files are available from the XXX database (accession number(s) XXX, XXX).*
- If the data are all contained **within the manuscript and/or Supporting Information files**, enter the following: *All relevant data are within the manuscript and its Supporting Information files.*
- If neither of these applies but you are able to provide **details of access elsewhere**, with or without limitations, please do so. For example:

*Data cannot be shared publicly because of [XXX]. Data are available from the XXX Institutional Data Access / Ethics Committee (contact via XXX) for researchers who meet the criteria for access to confidential data.*

*The data underlying the results presented in the study are available from (include the name of the third party*

All relevant data are within the manuscript and its Supporting Information files

*and contact information or URL).*

- This text is appropriate if the data are owned by a third party and authors do not have permission to share the data.

\* typeset

Additional data availability information:

1 Hepatitis C virus seroprevalence, testing, and treatment capacity in public health facilities in  
2 Ghana, 2016 – 2021; A multi-centre cross-sectional study.

3

4 Yvonne Ayerki Nartey<sup>1,2\*</sup>, Rafiq Okine<sup>3</sup>, Atsu Seake-Kwawu<sup>4</sup>, Georgia Gharthey<sup>5</sup>, Yaw  
5 Karikari Asamoah<sup>5</sup>, Ampem Darko Jnr Siaw<sup>2</sup>, Kafui Senya<sup>3</sup>, Amoako Duah<sup>6</sup>, Alex Owusu-  
6 Ofori<sup>7</sup>, Opei Adarkwa<sup>8</sup>, Seth Agyeman<sup>9</sup>, Sally Afua Bampoh<sup>10</sup>, Lindsey Hiebert<sup>11</sup>, Henry  
7 Njuguna<sup>11</sup>, Neil Gupta<sup>11</sup>, John W. Ward<sup>11</sup>, Lewis Rowland Roberts<sup>12</sup>, Ansumana Sandy  
8 Bockarie<sup>1</sup>, Yaw Asante Awuku<sup>13</sup>, Dorcas Obiri-Yeboah<sup>14</sup>

9

10 <sup>1</sup> Department of Internal Medicine, School of Medical Sciences, University of Cape Coast,  
11 Cape Coast, Ghana

12 <sup>2</sup> Department of Internal Medicine, Cape Coast Teaching Hospital, Cape Coast, Ghana

13 <sup>3</sup> World Health Organisation, Country Office, Accra, Ghana

14 <sup>4</sup> National Viral Hepatitis Control Program, Ghana Health Service, Accra, Ghana

15 <sup>5</sup> Ghana Field Epidemiology and Laboratory Training Programme, School of Public Health,  
16 University of Ghana, Legon, Ghana

17 <sup>6</sup> Department of Internal Medicine, University of Ghana Medical Centre, Accra, Ghana

18 <sup>7</sup> Department of Clinical Microbiology, School of Medicine and Dentistry, Kwame  
19 Nkrumah University of Science and Technology, Kumasi, Kumasi, Ghana

20 <sup>8</sup> Department of Obstetrics and Gynaecology, Komfo-Anokye Teaching Hospital, Kumasi,  
21 Ghana

22 <sup>9</sup> Department of Biochemistry, Cell and Molecular Biology, University of Ghana, Legon,  
23 Accra, Ghana

24 <sup>10</sup> Department of Internal Medicine, Greater Accra Regional Hospital, Accra, Ghana



25 <sup>11</sup> Coalition for Global Hepatitis Elimination, Task Force for Global Health, Decatur, GA,  
26 USA

27 <sup>12</sup> Department of Medicine, Division of Gastroenterology and Hepatology, Mayo Clinic  
28 Rochester, MN, USA

29 <sup>13</sup> Department of Medicine, University of Health and Allied Sciences, Ho, Ghana

30 <sup>14</sup> Department of Microbiology and Immunology, School of Medical Sciences, University of  
31 Cape Coast, Cape Coast Ghana

32

33 \*Corresponding author

34 Email: [ynartey@uccsms.edu.gh](mailto:ynartey@uccsms.edu.gh)

35

36 **Abstract**

37 The current burden of Hepatitis C virus infection and the availability of HCV-related services  
38 in Ghana are not well described. Previous estimates on HCV seroprevalence in the country are  
39 outdated. This study investigated the HCV seroprevalence and testing and treatment capacity  
40 in Ghana. A multi-centre cross-sectional study was conducted in which laboratory and blood  
41 bank registers from 17 public healthcare institutions in Ghana were reviewed. A survey on cost  
42 and availability of HCV-related testing and treatment was also performed. Crude and pooled  
43 estimates of HCV seroprevalence, frequency and median cost of available diagnostic tests and  
44 medicines were described. The crude HCV seroprevalence was 2.62% (95% CI 2.53 – 2.72)  
45 and the pooled estimate was 4.58% (95% CI 4.06 – 5.11) among 103,609 persons tested in  
46 laboratories. Age (OR 1.02 95% CI 1.01 – 1.02) and male sex (OR 1.26 95% CI 1.08 – 1.48)  
47 were predictors of a positive anti-HCV RDT test. Northern administrative regions in Ghana  
48 had the highest HCV seroprevalence ranging from 8.3 – 14.4%. Among 55, 458 potential blood  
49 donors, crude HCV seroprevalence was 3.57% (95% CI 3.42 – 3.72). Testing was through  
50 Rapid Diagnostic Test (RDT) kits in most facilities, and only 2 of 17 centres were performing  
51 HCV RNA testing. The median cost of an anti-HCV RDT test was \$0.97 (0-1.61) and \$3.23  
52 (1.61 – 7.58) for persons with and without government health insurance respectively. The  
53 median cost of a 12-week course of the pan-genotypic direct-acting antiviral therapy  
54 sofosbuvir-daclatasvir was \$887.70. In conclusion, there are significant regional differences in  
55 HCV burden across Ghana. Limited access to and cost of HCV RNA and DAA therapy hinders  
56 testing and treatment capability, and consequently HCV elimination efforts. A national HCV  
57 program supported with a sustainable financing plan is required to accelerate HCV elimination  
58 in Ghana.

59

60 **Keywords:**

61 Hepatitis C virus, anti-HCV, viral hepatitis, children, adolescents, Ghana, sub-Saharan Africa

62

### 63 **Introduction**

64 Each year, approximately 1.5 million new Hepatitis C virus (HCV) infections occur globally,  
65 and it is estimated that, as of early 2020, 56.8 million people in the world were living with  
66 chronic HCV infection (1, 2). HCV infection remains a significant risk factor for the  
67 development of chronic and end-stage liver disease (3). The World Health Organisation  
68 (WHO) estimates that in 2019, there were close to 300,000 HCV-related deaths, largely due to  
69 cirrhosis and primary hepatocellular carcinoma (HCC) worldwide (1). Globally, the population  
70 attributable fraction (PAF) of HCV infection to HCC is approximately 20%, however, this  
71 differs depending on geographic location, with a PAF of 11% and 79% for eastern Asia and  
72 northern Africa respectively (4).

73 In sub-Saharan Africa (SSA), the estimated HCV viraemic prevalence is 0.8%, and about 9.2  
74 million people in the region are living with HCV (5). The burden of HCV varies by SSA region.  
75 Modelled estimates of viraemic HCV infection in southern Africa suggest a prevalence of 0.35  
76 – 0.75%, whilst in western and several northern African countries, the viraemic prevalence is  
77 between 0.7-1.3% (2). Notably within West Africa, modelled estimates suggest a higher burden  
78 of viremia in Ghana and Burkina Faso, and the prevalence is reported to be between 1.3-2.3%  
79 (2). There are few **county**-specific population-based studies on HCV within SSA and estimates  
80 of disease burden are limited by the accuracy of serological testing, and the limited availability  
81 of molecular tests to determine viraemia (6, 7).

82 Since the development of the global health sector strategy (GHSS) on viral hepatitis 2016 -  
83 2021 (8), there has been a global effort to put in measures that will help countries reach  
84 elimination targets by the year 2030 (9). Key strategies for achieving these goals include the  
85 development of national hepatitis control programs and the scaling up of HCV testing and

86 treatment (10). The GHSS 2022-2030 update includes targets for 90% of people living with  
87 HCV are diagnosed and that 80% are cured. Furthermore, an incidence target of 5 cases per  
88 100,000 per year has been set (11), and although there has been a decline in global burden of  
89 HCV infection in recent years (2), it is unlikely that countries will achieve elimination targets  
90 by 2030 if more is not done to improve HCV testing and treatment at the country level (12).  
91 The challenges to HCV response in SSA include a lack of population-based screening  
92 programs, high cost and poor access to HCV RNA or core antigen testing, limited access to  
93 affordable treatment and lack of political will in some countries to address HCV care (7, 13).  
94 In Ghana, the estimated national HCV seroprevalence in a systematic review of studies  
95 conducted between 1995 and 2015 was 3.0% (14), however more recent estimates of HCV  
96 burden are lacking. Furthermore, the existing national policy on viral hepatitis published in  
97 2014 (15), is based on local data obtained before the year 2014. To determine progress towards  
98 HCV elimination and inform revised policies on HCV testing and treatment in Ghana, up-to-  
99 date epidemiological data are required. Furthermore, an assessment of testing and treatment  
100 capacity, availability, and affordability are necessary to develop strategies that will address  
101 country-specific challenges which hinder the progress towards HCV elimination. This study  
102 therefore aimed to determine the HCV seroprevalence in Ghana, and the testing and treatment  
103 capacity related to HCV infection across public healthcare institutions in the country.

104

## 105 **Materials and Methods**

### 106 **Study Design**

107 A cross-sectional study was conducted to determine the HCV seroprevalence using laboratory  
108 and blood bank registers of public health institutions in Ghana. Secondly, a survey was  
109 conducted in which heads of laboratory and pharmacy services for each institution were asked

110 to provide information on the types of HCV-related tests and medicines available, as well as  
111 the cost of tests and medicines in their facility for the year 2021.

### 112 **Sampling approach**

113 Ghana Health Service hospitals, teaching hospitals, public health reference labs and faith-based  
114 institutions, providing HCV-related testing in each of Ghana's 16 administrative regions were  
115 eligible for data collection. After the country was zoned into northern, middle, and southern  
116 zones, a purposive sampling approach was used to select at least 2 two regional hospitals, 2  
117 district hospitals, 1 faith-based hospital and 1 public health **refence** laboratory, as well as all  
118 teaching hospitals located within each zone.

### 119 **Data collection**

120 Data collection took place between February 2021 and December 2021. During the data  
121 collection period, all laboratory and blood bank records for HCV-related testing performed  
122 between 1<sup>st</sup> January 2016 to 31<sup>st</sup> December 2021 in the various study sites were reviewed. In  
123 total, 103,609 laboratory register entries and 55,458 blood bank register entries were retrieved  
124 for this study. Registers from which data were obtained were paper based, with data either  
125 hand-written or typed electronically in Microsoft Word or Excel. Data were recorded in these  
126 registers as monthly or yearly aggregates, or alternatively, on a case-by-case basis for  
127 individual cases tested. Data abstracted for this study included total number of people tested  
128 for HCV, and the number of cases that were either positive or negative. Data for age, gender,  
129 and year of testing were also abstracted where available. Three field workers per study site had  
130 access to patient data, which contained patient name and hospital ID number, however no  
131 information that could identify individual participants was abstracted during or after data  
132 collection. Additionally at each institution, we conducted a survey on laboratory testing and  
133 treatment capacity, and cost of testing and treatment for HCV using a study questionnaire. The  
134 survey was conducted among the heads of the laboratory and pharmacy units of each

135 institution. Data collected included price of HCV-related tests and medicines, types of testing  
136 available, average number of tests performed per month and limitations to testing.

### 137 **Statistical analysis**

138 Descriptive statistics are reported including frequencies and percentages (categorical variables)  
139 and mean with standard deviation (continuous variables) **are** reported. Crude and pooled  
140 estimates **are** reported for HCV seroprevalence. Crude estimates were determined using total  
141 persons positive for anti-HCV (numerator) divided by total persons tested (denominator)  
142 multiplied by 100. Pooled estimates were determined by treating each administrative region as  
143 a sub-group with inverse-variance weighting and recalculation of the overall prevalence (16).  
144 Logistic regression was used to determine predictors of HCV seropositivity. For cost of testing  
145 and treatment, the median cost and interquartile range were determined. The frequency and  
146 proportion of tests and medicines available at each institution were also determined. To handle  
147 missing data, available case analysis was used. Data analysis was performed using Stata,  
148 version 17; StataCorp software.

149

### 150 **Results**

#### 151 *Records reviewed and availability of data*

152 Out of 23 sites selected for data collection, data was available for 17 (73.9%) sites. Data was  
153 collected from 5 teaching hospitals, 6 regional hospitals, 3 district hospitals and 3 faith-based  
154 institutions, spanning 12 out of 16 administrative regions in Ghana. A total of 103,609  
155 laboratory register entries from January 2016 to December 2021 were recorded. Of these,  
156 22,876 entries were individual patient-level data whilst 80,733 were data reported from  
157 monthly or yearly aggregates. Additionally, 55,458 blood bank entries were reviewed from 13  
158 blood banks. Data reported from each site varied by year because not all facilities could retrieve  
159 paper-based records for every year requested.

160

161 *HCV seroprevalence from hospital laboratory registers*

162 Seroprevalence estimates were obtained from results from testing with rapid diagnostic test  
163 kits (RDT) recorded in laboratory registers. Out of 23,175 records in which gender information  
164 was available, males comprised 12,871 (55.5%) and females 10,304 (44.5%) of persons tested.  
165 Out of 19,752 records where age information was available, the median age of persons tested  
166 was 31 years (IQR 23-45). In total 2,721 out of 103,609 individuals were anti-HCV positive,  
167 representing a crude HCV seroprevalence of 2.62% (95% CI 2.53 – 2.72) across the country.  
168 The pooled HCV seroprevalence based on sample size per administrative region was 4.58%  
169 (95% CI 4.06 – 5.11). The HCV seroprevalence was lowest in the 0-11 years age group (2.13%)  
170 and highest in the 60+ years age group (7.59%) (Figure 1). Age was a predictor of a positive  
171 anti-HCV RDT test (OR 1.02 95% CI 1.01 – 1.02). Males were more likely to test positive than  
172 females (OR 1.26 95% CI 1.08 – 1.48) (Table 1).

173

174 **Figure 1.** Hepatitis C antibody (Anti-HCV) seroprevalence based on laboratory-based rapid  
175 diagnostic tests (RDTs) by age group, 2016 – 2021. 0-11 years (n=1126), 12-17 years (n=906),  
176 18-29 years (n=7075), 30-39 years (n=4132), 40-49 years (n=2668) 50-59 years (n=1736) 60+  
177 years (n=2109).

178 When the burden across the country was evaluated, the highest HCV seroprevalence was found  
179 in the Upper East (14.44%) and Upper West (13.54%) regions of Ghana (Figure 2). This trend  
180 was similar when the burden across regions was examined in children aged less than 18 years.  
181 Where data on age were available, it was found that seroprevalence was highest in the Upper  
182 East (7.8%) and Savannah (6.0%) regions, and lowest in the Greater Accra region (0.5%)  
183 (Figure 3).

184

185 **Figure 2.** HCV seroprevalence based on laboratory-based RDT tests by region, 2016 – 2021  
 186 (all ages). Map Source: <https://www.mapchart.net/africa-detailed.html>

187  
 188 **Figure 3.** HCV seroprevalence in children and adolescents (<18 years) based on laboratory-  
 189 based RDT tests by region, 2016 – 2021.

190 Table 1. Factors associated with HCV seropositivity among hospital attendants between 2016  
 191 - 2020.

|                                                                                                                       | Adjusted Odds Ratio* | 95% CI        | P value |
|-----------------------------------------------------------------------------------------------------------------------|----------------------|---------------|---------|
| <b>Sex</b>                                                                                                            |                      |               |         |
| Male                                                                                                                  | 1.262                | 1.075 – 1.480 | 0.004   |
| Age (years)                                                                                                           | 1.018                | 1.014 - 1.022 | <0.001  |
| <b>Year</b>                                                                                                           |                      |               |         |
| 2016                                                                                                                  | Ref                  |               |         |
| 2017                                                                                                                  | 0.39                 | 0.19 – 0.80   | 0.01    |
| 2018                                                                                                                  | 0.35                 | 0.12 – 0.51   | <0.001  |
| 2019                                                                                                                  | 0.44                 | 0.22 – 0.88   | 0.02    |
| 2020                                                                                                                  | 0.52                 | 0.26 – 1.05   | 0.07    |
| <b>Region</b>                                                                                                         |                      |               |         |
| Volta                                                                                                                 | Ref                  |               |         |
| Central                                                                                                               | 1.32                 | 0.77 – 2.28   | 0.31    |
| Eastern                                                                                                               | 1.02                 | 0.58 – 1.79   | 0.95    |
| Greater Accra                                                                                                         | 2.09                 | 1.11 – 3.93   | 0.02    |
| Bono                                                                                                                  | 4.26                 | 2.29 – 7.92   | <0.001  |
| Upper East                                                                                                            | 11.45                | 6.76 – 19.40  | <0.001  |
| Western                                                                                                               | 0.86                 | 0.25 – 3.02   | 0.82    |
| Savannah                                                                                                              | 5.48                 | 2.87 – 10.46  | <0.001  |
| *Multivariable model adjusted for age (continuous) gender (male, female), year (categorical) and region (categorical) |                      |               |         |

192

193 *HCV seroprevalence from blood bank registers*



194 A total of 1,980 out of 55,458 people screened at blood banks were anti-HCV positive,  
195 representing a crude seroprevalence of 3.57% (95% CI 3.42 – 3.72). The pooled HCV  
196 seroprevalence was 2.65% (95% CI 2.30 – 3.01). The regions with the highest seroprevalence  
197 were the Upper West region (11.28%) followed by the Upper East region (6.87%) (Figure 4).

198

199 **Figure 4.** HCV seroprevalence among potential blood donors by region based on RDT  
200 testing 2016 – 2020.

201

#### 202 *Laboratory capacity assessment*

203 Out of 17 study sites, only two teaching hospitals were performing HCV RNA testing for  
204 establishing the presence of viremia (Table 2). Of these, one centre had capacity to perform the  
205 test on-site, and the other outsourced the testing to a private diagnostic company. In the  
206 remainder of the sites, patients were advised to use private diagnostic companies for HCV RNA  
207 testing. Only one facility conducted HCV genotyping. Rapid diagnostic testing was widely  
208 available across all sites; however, ELISA-based testing was limited to **teaching** (4/5) and a  
209 few regional hospitals (3/17). RDT kits available varied by brand, with some laboratory staff  
210 uncertain whether the test kits in use were approved by the Ghana Food and Drugs Authority.  
211 Examples of RDT brands used included DiaSpot, Wondfo, Abbott SD Bioline™, InTec,  
212 HighTop, and Global RDT. At the time of the study, the Ghana FDA list of accredited HCV  
213 RDT kits included only the Wondfo HCV kit. The Abbot SD Bioline and InTec RDT were  
214 listed in the WHO prequalified in vitro diagnostic products. No centre was performing HCV  
215 core antigen (cAg) testing. Direct-acting antiviral (DAA) therapy was not stocked in any  
216 hospital pharmacy visited; however, it was reported that these medicines could be obtained  
217 from private pharmacies if the patient could afford to pay out of pocket. Each hospital

218 pharmacist asked referenced the same pharmacy/supplier located in Accra, the capital of  
 219 Ghana, for purchase of sofosbuvir-daclatasvir.

220

221 Table 2 Summary of HCV-related tests available by type of health facility (2021).

|                         | Teaching | Regional | District | CHAG | Total n/N (%) |
|-------------------------|----------|----------|----------|------|---------------|
| <i>Diagnostics</i>      |          |          |          |      |               |
| Anti-HCV (RDT)          | 5/5      | 6/6      | 3/3      | 3/3  | 17/17 (100)   |
| Anti-HCV (serology)     | 4/5      | 3/6      | 0/3      | 0/3  | 7/17 (41.2)   |
| HCV cAg                 | 0/5      | 0/6      | 0/3      | 0/3  | 0/17 (0)      |
| HCV RNA*                | 2/5      | 0/6      | 0/3      | 0/3  | 2/17 (11.8)   |
| HCV Genotyping          | 1/5      | 0/6      | 0/3      | 0/3  | 1/17 (5.9)    |
| <i>Therapeutics</i>     |          |          |          |      |               |
| Pan-genotypic therapy** | 0/5      | 0/6      | 0/3      | 0/3  | 0/17(0)       |

HCV= Hepatitis C virus, RDT=Rapid Diagnostic Test, cAg= Core antigen, RNA= Ribonucleic acid. \*One site performed test on-site, and the other outsourced to a private laboratory. \*\*Medication was not available in the hospital pharmacy but was available on request from private pharmacies.

222

223

224 Table 3. Summary of HCV testing and treatment costs

|                    | Subsidized price with government health insurance<br>USD Equivalent*<br>Median (Range) | Non-subsidized price without government health insurance<br>USD Equivalent*<br>Median (Range) |
|--------------------|----------------------------------------------------------------------------------------|-----------------------------------------------------------------------------------------------|
| <i>Diagnostics</i> |                                                                                        |                                                                                               |
| Anti-HCV (RDT)     | 0.97 (0 <sup>+</sup> – 1.61)                                                           | 3.23 (1.61 – 7.58)                                                                            |
| Anti-HCV (ELISA)   | 3.15 (1.96 – 8.07))                                                                    | 7.26 (5.65 – 50.03)                                                                           |

|                                                    |                |                        |
|----------------------------------------------------|----------------|------------------------|
| HCV RNA                                            | Not subsidized | 88.77 (88.77 – 129.12) |
| <i>Therapeutic</i>                                 |                |                        |
| 12-week course of pan-genotypic therapy            | Not subsidized | 887.70                 |
| *1 GHS = USD 0.1614 at the time of data collection |                |                        |
| †Only one facility offered this test for free      |                |                        |

225

226 *Cost of diagnosis and treatment*

227 The price for anti-HCV testing was based on health insurance status. Cost of testing for both  
228 RDT and ELISA was subsidized if an individual had government health insurance; \$0.97 vs  
229 \$3.23 for RDT and \$3.15 vs \$7.26 for ELISA for insured vs non-insured patients respectively.  
230 However, for HCV RNA, there was no subsidy on cost of testing, and patients had to pay out-  
231 of-pocket regardless of insurance status. It was reported by laboratory heads that the cost of  
232 testing was dependent on the price of the test from the supplier. DAA therapy was not  
233 subsidized by government health insurance. A 12-week course of pan-genotypic DAA  
234 sofosbuvir-daclatasvir was \$887.70. Table 3 summarizes diagnostic and treatment costs.

235

236 **Discussion**

237 In this study we report a pooled HCV seroprevalence of 4.6% in patients tested at public health  
238 care facilities, which is slightly lower than reported in neighbouring countries. Seroprevalence  
239 estimates from a systematic review in Cameroon, in which 87% of studies included were  
240 facility-based, reported a pooled anti-HCV prevalence of 6.5% (17) whilst in north-east  
241 Nigeria, the reported seroprevalence among 560,857 out-patient clinic patients and 60,285 in-  
242 patient admissions attending a tertiary referral centre was 6.9%. In Ghana, the national HCV  
243 seroprevalence based on a systematic review by Agyeman et al in 2016 was 3.0% (14), however  
244 more recent nationwide estimates are not available. The difference in seroprevalence between  
245 this and Agyeman’s study may be influenced by the type and quality of diagnostic tests used

246 in studies included in the systematic review, including the sensitivity and specificity of test  
247 kits, or may reflect the different populations in the two studies. In the present study, data  
248 reviewed included that from hospital lab results of patients who may likely have been tested  
249 because of clinician suspicion of HCV infection or its related conditions such as chronic liver  
250 disease, or alternatively in the work-up for conditions in which HCV is highly co-morbid such  
251 as chronic renal failure or sickle cell disease. Notwithstanding these possibilities, it is important  
252 to note that the population tested in hospital laboratories also includes persons directed by  
253 clinicians to undergo testing for non-HCV-related conditions such as pregnant women, patients  
254 attending outpatient clinics with long term chronic conditions such as hypertension, and healthy  
255 individuals undergoing routine medical screening. On the other hand, the study by Agyeman  
256 and colleagues reviewed studies comprising significantly low-risk populations, with their  
257 estimate heavily influenced by large studies conducted among blood donors. This is likely to  
258 have led to a lower estimate of national seroprevalence in their study.

259 Upon comparison of the disaggregated HCV seroprevalence among blood donors in the  
260 Agyeman study of 2.6% to the anti-HCV prevalence among blood donors in this study, we  
261 found a similar estimate of 2.7%. Seroprevalence was likely lower among potential blood  
262 donors compared with the rest of the study population because prior to testing, individuals **are**  
263 routinely assessed for eligibility to donate using a standard screening form to eliminate persons  
264 who are likely to test positive for HIV, HBV, or HCV as per Ghana's national blood donation  
265 guidelines (18), thus making this population low-risk. Reported anti-HCV prevalence in studies  
266 from other countries in the SSA region among blood donors range from 0.8% in Ethiopia (19)  
267 to 2.32% in Mali (20), and 6.9% in neighbouring Burkina Faso (21).

268 This is the first study to explore the HCV seroprevalence in the majority of administrative  
269 regions in Ghana, since previous studies on HCV have largely been conducted in the Greater  
270 Accra and Ashanti regions (14, 22, 23, 24, 25, 26). Significantly, there was unequal burden of

271 disease across the different administrative regions, with the northern regions demonstrating the  
272 highest seroprevalence (8.6-14.4%) and the Greater Accra Region in southern Ghana  
273 demonstrating lowest seroprevalence (1.0%). A similar pattern has been reported with the  
274 burden of Hepatitis B Virus (HBV) in Ghana (27). Northern Ghana, compared with the rest of  
275 the country, has lower access to healthcare, weaker healthcare infrastructure, lower rates of  
276 hospital deliveries and lower doctor-to-patient and nurse-to-patient ratios (28, 29, 30), which  
277 may explain the higher burden of HCV in this part of the country. Furthermore, cultural  
278 practices such as scarification of the face and other parts of the body which may occur as early  
279 as the first week of life, for purposes of tribal and family identification, spiritual protection and  
280 traditional medicine use are more prevalent in the northern regions than in the south (31), and  
281 likely contribute to higher rates of HCV transmission in the region. In addition to this,  
282 chieftaincy and ethnic conflicts which occur at a higher rate in Northern Ghana, may lead to  
283 increased HCV burden directly through blood exposure or indirectly through weakened  
284 socioeconomic and health infrastructure (32, 33). Southern Ghana was found to have the lowest  
285 anti-HCV prevalence in this study. In the Greater Accra region, a 2020 study conducted in a  
286 public hospital among 728 patients reported an HCV seroprevalence of 1.6% (26), close to our  
287 reported estimate in the same region of 1.0%.

288 Several factors may contribute to the HCV burden in Ghana. This includes a poor level of HCV  
289 knowledge and awareness in the population, which may mean individuals are less likely to be  
290 aware of their HCV status and therefore would be less likely to undertake practices to limit  
291 spread (6). For example, studies in the Ashanti region demonstrated that the majority of study  
292 participants had never heard of HCV and were unaware of its modes of transmission (24, 34).  
293 It is possible that healthcare provider knowledge on HCV is also inadequate, since some studies  
294 suggest knowledge gaps in HBV-related care among providers in Ghana (35, 36, 37), however  
295 specific studies on knowledge of HCV among healthcare workers in Ghana are lacking. If the

296 same is true, and HCV knowledge among healthcare workers in Ghana is insufficient, this may  
297 mean that healthcare workers may be less likely to screen, treat, or link HCV patients to  
298 appropriate care. Other factors such as blood to blood exposure including through scarification  
299 as previously described, unsafe male circumcision practices and intravenous drug use (IVDU)  
300 are potential contributory factors to HCV infection in Ghana and remain a probable mode of  
301 transmission (38). The degree to which IVDU is prevalent in Ghana is not well established,  
302 however a study among inmates reported that roughly one third of inmates had a history of  
303 intravenous drug use (39). In a study of 323 person who inject drugs (PWID) and persons who  
304 use drugs (PWUD) conducted in four regions in Ghana, HCV seroprevalence was reported to  
305 be 5.6% (40). There is evidence to suggest that a significant proportion of PWID in Ghana  
306 reuse and share needles due to the high cost and difficult access (39, 41). Currently there are  
307 limited harm reduction programmes for PWID in Ghana, with no formal syringe exchange  
308 programmes for this key population (38).

309 A further mode of HCV spread may be through vertical transmission from pregnant women to  
310 their babies. Studies among pregnant women have demonstrated seroprevalence data ranging  
311 from 2.7% in the Central region (42) to 7.7% in a study in the Ashanti region (23). Although  
312 anti-HCV testing is recommended as part of routine antenatal care screening in Ghana, this test  
313 is not free in many public health facilities, and a proportion of pregnant women may not be  
314 able to pay out-of-pocket. For example, in this study, only one centre offered the anti-HCV test  
315 at no charge for insured patients. Furthermore, unlike Human Immunodeficiency Virus (HIV),  
316 HBV, and syphilis, neither the maternal health record book nor the labour ward registers in  
317 Ghana require recording of HCV status, therefore midwives or antenatal clinic nurses may  
318 overlook HCV testing during pregnancy and delivery.

319 This study found a seroprevalence of 2.13% among children aged 0-11 years and 3.31% among  
320 those aged 12-17 years attending healthcare facility laboratories. A recent global systematic

321 review reported an anti-HCV seroprevalence in African children (<20 years old) of 3.02%,  
322 with seropositivity of 2.45% in those aged <10 years and 4.74% in those between ages 10 – 20  
323 years (43). In Ghana, a study at the Princess Marie Louis Children’s Hospital in the Greater  
324 Accra Region reported a seroprevalence of 0.5% from a hospital population of 200 children,  
325 comparable to this study’s finding of 0.5% in the same region (25). The anti-HCV prevalence  
326 found in this study, particularly in the Bono, Savannah and Upper East regions demonstrate the  
327 need to include eligible children (above 3 years of age) and adolescents in a screening and  
328 treatment program for HCV in Ghana, in line with current guidance (44, 45).

329 Although RDT kits were widely available in all sites visited, it was concerning to note that  
330 laboratory personnel were uncertain whether these kits were either approved for use by the  
331 Ghana Food and Drugs Authority or WHO pre-qualified. A previous study found that out of  
332 17 different HCV RDT kits used in 374 public and private diagnostic laboratories in Ghana,  
333 only 2 (11.8%) were WHO pre-qualified (46). At study sites visited, procurement of test kits  
334 was handled at the facility level by procurement officers or laboratory personnel, with no direct  
335 input from the Ghana National Viral Hepatitis Control Program nor Ministry of Health. It is  
336 known that the performance of RDT kits is variable, and sensitivity may range from 75% to  
337 100% (47, 48). Consequently, the use of non-approved RDT kits may increase the chances of  
338 false negative or false positive anti-HCV results, which may therefore under- or overestimate  
339 HCV seropositivity if this method is used as the sole screening tool (49). The variability in  
340 price of anti-HCV kits was also of concern, and this is likely due to the different brands of kits  
341 used, since laboratory personnel reported that pricing was dependent on the price from the  
342 supplier. A specific policy on test kit procurement involving purchase and subsequent  
343 distribution by the Ghana National Viral Hepatitis Control Program will not only ensure that  
344 FDA approved or WHO-prequalified kits are used but may also bring some stability to pricing

345 in public health facilities. Furthermore, the poor availability of ELISA testing in sites visited  
346 emphasizes the need to ensure the use of pre-qualified HCV RDTs.

347 PCR testing for HCV RNA was only available in two centres visited, with one of these  
348 outsourcing to a private laboratory. Qualitative or quantitative HCV RNA testing is crucial for  
349 determining which patients require direct-acting antiviral (DAA) therapy. In the absence of  
350 PCR capacity in public hospitals, patients must often patronise private laboratories. In addition  
351 to limited availability, the high cost of \$88.7 found in this study poses a significant barrier to  
352 HCV treatment in Ghana (6, 14, 46). If Ghana is to achieve scale-up of testing and treatment,  
353 there is a pressing need to increase PCR testing capacity. One way may be to leverage the  
354 improved PCR testing capacity in some public health facilities in response to the COVID-19  
355 pandemic. Furthermore, there is a need to decentralise testing to, **at** a minimum, regional  
356 hospital level. To increase testing access, it may also be necessary to consider alternate methods  
357 for testing, including the use of dried blood spot sampling (DBS), which is cheaper and less  
358 vulnerable to strict cold-chain storage and transfer requirements (50), in place of venous blood  
359 sampling. Furthermore, development of testing algorithms based on HCV core antigen testing  
360 (51), which is currently not available in Ghana, may be an alternate way to scale-up testing and  
361 treatment in the country.

362 In this study, no hospital visited had stock of DAA medication in their pharmacies, but it was  
363 noted that these drugs could be obtained from privately run pharmacies if the patient could  
364 afford the treatment. There are currently no government subsidies on the cost of medications  
365 and current pricing in the country for a 12-week course of pan-genotypic therapy appears  
366 higher than in other African countries such as Nigeria and Cameroon (\$750) (52). A 2022 cost-  
367 utility analysis in four African countries estimated the generic price for a 12-week course of  
368 sofosbuvir/daclatasvir to be \$195 and for sofosbuvir/velpatasvir to be \$450 (53). For many  
369 patients requiring HCV treatment in Ghana, personal income may be insufficient to cover the



370 current costs of diagnosis and treatment. Relying on complete government financing may also  
371 not be practical or sustainable (52). To improve treatment access, strategies to overcome these  
372 costs are necessary, and may include shared financing between governments and individuals,  
373 improved global access programs, reduced pricing by large diagnostic and pharmaceutical  
374 companies and increased advocacy by civil society groups and patients to expand access to  
375 care.

376 The strengths of this study include the broad coverage of administrative regions in Ghana, and  
377 the inclusion of data different types and levels of public health facilities, which provided  
378 previously unreported data on HCV seroprevalence in certain regions in the country.  
379 Furthermore, we were able to provide age-related estimates of HCV seropositivity, highlighting  
380 the need to include children in any HCV screening and treatment program in Ghana. Another  
381 major strength of this study is that we were able to collect information on capacity and pricing  
382 of HCV testing and treatment in Ghana, which can directly inform policy in the country.

383 Limitations of this study included the use of secondary data, which meant that not all  
384 institutions were able to provide data for all the years of interest. In addition to this, the majority  
385 of the data was aggregated, which limited the ability to assess for risk factors in the study  
386 population. Furthermore, the study population comprised hospital attendants, whose  
387 seroprevalence estimates may be higher than that of the general population. There is also a  
388 need to assess the prevalence of viraemic HCV infection, rather than seroprevalence at the  
389 national level since such population-based data are lacking in Ghana. Finally, the use of varied  
390 brands of RDT test kits with different sensitivity and specificity may have affected the accuracy  
391 of prevalence estimates.

## 392 **Conclusion and recommendations**

393 The uncertainty of the true national HCV prevalence in the general Ghanaian population  
394 emphasizes the need for additional population-based studies to improve disease burden

395 estimation, including the HCV incidence, viraemia prevalence, and mortality associated with  
396 HCV in the country. Possible solutions will be to undertake strategies such as testing of stored  
397 population-based samples or undertaking a national testing campaign for HCV. In this study,  
398 we have identified that there are significant regional differences in HCV burden across Ghana,  
399 with the northern regions demonstrating the highest HCV seroprevalence. Targeting  
400 prevention, testing and treatment policies for northern Ghana may therefore be warranted.  
401 Limited access to and cost of HCV RNA testing and DAA therapy hinders testing and treatment  
402 capability, and consequently HCV elimination efforts. There may be a need to improve HCV  
403 awareness in Ghana, through multiple avenues including a national campaign by the Ministry  
404 of Health. An improved policy on RDT kits is required, with measures put in place to ensure  
405 that only Ghana's FDA or WHO prequalified test kits are used in the public and private sectors.  
406 Finally, a national program for HCV elimination including a financing plan for sustainability  
407 is important if Ghana is to achieve the 2030 viral hepatitis elimination targets.

408

#### 409 **Acknowledgements**

410 The authors would like to acknowledge the following people and groups:

- 411 - Hepatitis Foundation of Ghana
- 412 - Hepatitis Society of Ghana
- 413 - Ghana Association for the Study of Liver and Digestive Diseases
- 414 - Ghana Field Epidemiology and Laboratory Training Program, School of Public  
415 Health, University of Ghana
- 416 - All individuals who contributed data to the HEAT Project and participated in the  
417 project launch and stakeholder's meetings

418

419

420 **References**

- 421 1. WHO. Hepatitis C. 2022 24 June 2022.
- 422 2. Blach S, Terrault NA, Tacke F, Gamkrelidze I, Craxi A, Tanaka J, et al. Global change in  
423 hepatitis C virus prevalence and cascade of care between 2015 and 2020: a modelling study.  
424 *The Lancet Gastroenterology & Hepatology*. 2022;7(5):396-415.
- 425 3. Jafri SM, Gordon SC. Epidemiology of Hepatitis C. *Clin Liver Dis (Hoboken)*.  
426 2018;12(5):140-2.
- 427 4. McGlynn KA, Petrick JL, El-Serag HB. Epidemiology of Hepatocellular Carcinoma.  
428 *Hepatology*. 2021;73(S1):4-13.
- 429 5. Organization WH. Global progress report on HIV, viral hepatitis and sexually  
430 transmitted infections, 2021: accountability for the global health sector strategies 2016–  
431 2021: actions for impact. 2021.
- 432 6. Tachi K. Hepatitis C virus infection in Ghana: time for action is now. *Ghana Medical*  
433 *Journal*. 2018;52(1):1-2.
- 434 7. Sonderup MW, Afihene M, Ally R, Apica B, Awuku Y, Cunha L, et al. Hepatitis C in  
435 sub-Saharan Africa: the current status and recommendations for achieving elimination by  
436 2030. *The Lancet Gastroenterology & Hepatology*. 2017;2(12):910-9.
- 437 8. Organization WH. Global health sector strategy on viral hepatitis 2016-2021.  
438 Towards ending viral hepatitis. World Health Organization; 2016.
- 439 9. Waheed Y, Siddiq M, Jamil Z, Najmi MH. Hepatitis elimination by 2030: progress and  
440 challenges. *World journal of gastroenterology*. 2018;24(44):4959.
- 441 10. Brunner N, Bruggmann P. Trends of the Global Hepatitis C Disease Burden: Strategies  
442 to Achieve Elimination. *J Prev Med Public Health*. 2021;54(4):251-8.
- 443 11. WHO. Global health sector strategies on, respectively, HIV, viral hepatitis and  
444 sexually transmitted infections for the period 2022-2030. Geneva: World Health  
445 Organisation; 2022 June 2022.
- 446 12. Razavi H, Sanchez Y, Pangerl A, Cornberg M. Global timing of hepatitis C virus  
447 elimination: estimating the year countries will achieve the World Health Organization  
448 elimination targets. *J Hepatol*. 2019;70(1).
- 449 13. Shah R, Agyei-Nkansah A, Alikah F, Asamoah-Akuoko L, Bagou YCO, Dhiblawe A, et al.  
450 Hepatitis C virus in sub-Saharan Africa: a long road to elimination. *The Lancet*  
451 *Gastroenterology & Hepatology*. 2021;6(9):693-4.
- 452 14. Agyeman AA, Ofori-Asenso R, Mprah A, Ashiagbor G. Epidemiology of hepatitis C  
453 virus in Ghana: a systematic review and meta-analysis. *BMC Infect Dis*. 2016;16(1):391.
- 454 15. MinistryOfHealth. National Policy On Viral Hepatitis. In: Health Mo, editor.  
455 Accra2014.
- 456 16. Nyaga VN, Arbyn M, Aerts M. Metaprop: a Stata command to perform meta-analysis  
457 of binomial data. *Archives of Public Health*. 2014;72:1-10.
- 458 17. Bigna JJ, Amougou MA, Asangbeh SL, Kenne AM, Nansseu JR. Seroprevalence of  
459 hepatitis C virus infection in Cameroon: a systematic review and meta-analysis. *BMJ Open*.  
460 2017;7(8):e015748.
- 461 18. National.Blood.Service.Ghana. Are you eligible to give blood? 2022 [Available from:  
462 <https://nbs.gov.gh/>.
- 463 19. Lake EA, Fite RO, Gebrekirstos LG, Gebremedhin MH, Obsa MS, Gelaw KA.  
464 Seroprevalence of hepatitis c virus infection among blood donors in Ethiopia: a systematic  
465 review and meta-analysis. *BMC Infect Dis*. 2021;21(1):131.

- 466 20. Jary A, Dienta S, Leducq V, Le Hingrat Q, Cisse M, Diarra AB, et al. Seroprevalence  
467 and risk factors for HIV, HCV, HBV and syphilis among blood donors in Mali. *BMC Infect Dis.*  
468 2019;19(1):1064.
- 469 21. Wongjarupong N, Oli S, Sanou M, Djigma F, Kiba Koumare A, Yonli AT, et al.  
470 Distribution and Incidence of Blood-Borne Infection among Blood Donors from Regional  
471 Transfusion Centers in Burkina Faso: A Comprehensive Study. *Am J Trop Med Hyg.*  
472 2021;104(4):1577-81.
- 473 22. Blankson A, Wiredu EK, Gyasi RK, Adjei A, Tettey Y. Sero-Prevalence of Hepatitis B  
474 and C Viruses in Cirrhosis of the Liver in Accra, Ghana. *Ghana Medical Journal.*  
475 2005;39(4):132-7.
- 476 23. Ephraim R, Donko I, Sakyi SA, Ampong J, Agbodjakey H. Seroprevalence and risk  
477 factors of hepatitis B and hepatitis C infections among pregnant women in the Asante Akim  
478 North Municipality of the Ashanti region, Ghana; a cross sectional study. *African health*  
479 *sciences.* 2015;15(3):709-13.
- 480 24. Adoba P, Boadu SK, Agbodzakey H, Somuah D, Ephraim R, Odame EA. High  
481 prevalence of hepatitis B and poor knowledge on hepatitis B and C viral infections among  
482 barbers: a cross-sectional study of the Obuasi municipality, Ghana. *BMC public health.*  
483 2015;15(1):1-7.
- 484 25. Duedu KO, Asomah D, Kugbemanya S, Adiku TK. Low seroprevalence of hepatitis C  
485 among children at the Princess Marie Louis Children's Hospital in Accra, Ghana. *Pan African*  
486 *Medical Journal.* 2021;40(1).
- 487 26. Birjandi MM, Oroei M. The prevalence of positive rapid diagnostic test of hepatitis C  
488 virus infection in Ghana. *The Pan African medical journal.* 2020;36:322.
- 489 27. Nartey YA, Okine R, Seake-Kwawu A, Ghartey G, Asamoah YK, Senya K, et al. A  
490 nationwide cross-sectional review of in-hospital hepatitis B virus testing and disease burden  
491 estimation in Ghana, 2016-2021. *BMC Public Health.* 2022;22(1):1-15.
- 492 28. Atinga RA, Abekah-Nkrumah G, Domfeh KA. Managing healthcare quality in Ghana: a  
493 necessity of patient satisfaction. *International Journal of Health Care Quality Assurance.*  
494 2011.
- 495 29. Ameyaw EK, Amoah RM, Njue C, Tran NT, Dawson A. An assessment of hospital  
496 maternal health services in northern Ghana: a cross-sectional survey. *BMC Health Services*  
497 *Research.* 2020;20(1):1-11.
- 498 30. Xu Y, Abena AAN, Bakpa EK. Poverty and Health Issues in the Northern Part of  
499 Ghana. *Poverty and Health Issues in the Northern Part of Ghana.* 2019;9(8):14-21.
- 500 31. Irving A. An ancient practice: Scarification and tribal marking in Ghana. 2007.
- 501 32. Yaro S, Ngmenkpieo F. Chieftaincy succession conflicts in the Bunkpurugu traditional  
502 area, North East, Ghana. *UDS International Journal of Development.* 2020;7(1):285-95.
- 503 33. Bukari FIM, Kendie SB, Sulemana M, Galaa SZ. The effects of chieftaincy and land  
504 conflicts on the socio-political development of Northern Ghana. *International Journal of*  
505 *Social Science Research.* 2017;5(1):101-19.
- 506 34. Mutocheluh M, Kwarteng K. Knowledge and occupational hazards of barbers in the  
507 transmission of hepatitis B and C was low in Kumasi, Ghana. *The Pan African medical*  
508 *journal.* 2015;20.
- 509 35. Senoo-Dogbys VE. The Knowledge of Post Exposure Prophylaxis for Hepatitis B Virus  
510 and the Related Factors among Health Care Workers in Accra, Ghana. *Archives of*  
511 *Occupational Health.* 2022;6(1):1164-70.

- 512 36. Adjei CA, Asamoah R, Atibila F, Ti-enkawol GN, Ansa-Nyarko M. Mother-to-child  
513 transmission of hepatitis B: extent of knowledge of physicians and midwives in Eastern  
514 region of Ghana. *BMC Public Health*. 2016;16(1):537.
- 515 37. Afihehene MY, Duduyemi BM, A-Tetteh H-L, Khatib M. Knowledge, attitude and  
516 practices concerning Hepatitis B infection, among healthcare workers in Bantama, Ghana: a  
517 cross sectional study.
- 518 38. Beard JA-S, Yaw; Messersmith, Lisa. Injection Drug Use in Ghana. *Public Health Post*.  
519 2017.
- 520 39. Adjei AA, Armah HB, Gbagbo F, Ampofo WK, Boamah I, Adu-Gyamfi C, et al.  
521 Correlates of HIV, HBV, HCV and syphilis infections among prison inmates and officers in  
522 Ghana: A national multicenter study. *BMC Infect Dis*. 2008;8(1):33.
- 523 40. Guure C, Obiri-Yeboah Laryea SM, Dery S, Baptista da Silva C, Asamoah-Adu C, Ayisi-  
524 Addo S, et al. Behavioural Risk for HIV, Hepatitis B, and Hepatitis C Infections among a  
525 Population of Drug Users and Injectors across Four Regions in Ghana. *Interdisciplinary  
526 Perspectives on Infectious Diseases*. 2022;2022:2544481.
- 527 41. Messersmith LJ, Adjei R, Beard J, Bazzi AR, Earlywine JJ, Darko E, et al. High levels of  
528 used syringe use and unsafe sex among people who inject drugs in Kumasi, Ghana: an  
529 urgent call for a comprehensive harm reduction approach. *Harm Reduction Journal*.  
530 2021;18(1):62.
- 531 42. Tetteh AK, Aglagoh G, Baffe C, Arthur S, Prince B, Tetteh GR, et al. A Hepatitis C  
532 Sentinel Seroprevalence, Cape Coast, Ghana. *Journal of Microbiology and Infectious  
533 Diseases*. 2020;10(01):52-5.
- 534 43. Melikoki V, Kourlaba G, Kanavaki I, Fessatou S, Papaevangelou V. Seroprevalence of  
535 hepatitis C in children without identifiable risk-factors: a systematic review and meta-  
536 analysis. *Journal of Pediatric Gastroenterology and Nutrition*. 2021;72(6):e140-e8.
- 537 44. World.Health.Organisation. Treatment of adolescents and children with chronic HCV  
538 infection. Geneva; 2022.
- 539 45. Indolfi G, Easterbrook P, Dusheiko G, El-Sayed MH, Jonas MM, Thorne C, et al.  
540 Hepatitis C virus infection in children and adolescents. *The lancet Gastroenterology &  
541 hepatology*. 2019;4(6):477-87.
- 542 46. Owusu-Oduro P. HCV Diagnosis in Ghana—Limitations and Public Health Implications.
- 543 47. Bigwan E, Ado S, Umoh V, Inabo H. Evaluation of Two Commonly Used Commercial  
544 Immunochromatographic and ELISA Screening Kits for the Detection of Anti-HCV Antibodies  
545 among Patients in North Central Nigeria. *British Journal of Medicine and Medical Research*.  
546 2014;4(24):4192.
- 547 48. Jargalsaikhan G, Oidovsambuu O, Dashtseren B, Boldbaatar D, Genden Z, Tuya A, et  
548 al. Assessment of Rapid Test Kits to Detect HBsAg and Anti-HCV. *Journal of Hepatology*.  
549 2016;2(64):S457.
- 550 49. Twagirumugabe T, Swaibu G, Bergström T, Walker TD, Gahutu JB, Norder H. Low  
551 prevalence of hepatitis C virus RNA in blood donors with anti-hepatitis C virus reactivity in  
552 Rwanda. *Transfusion*. 2017;57(10):2420-32.
- 553 50. Tuailleon E, Mondain AM, Meroueh F, Ottomani L, Picot MC, Nagot N, et al. Dried  
554 blood spot for hepatitis C virus serology and molecular testing. *Hepatology*. 2010;51(3):752-  
555 8.
- 556 51. Biondi MJ, van Tilborg M, Smookler D, Heymann G, Aquino A, Perusini S, et al.  
557 Hepatitis C Core-Antigen Testing from Dried Blood Spots. *Viruses*. 2019;11(9).

- 558 52. Assefa Y, Hill PS, Ulikpan A, Williams OD. Access to medicines and hepatitis C in  
559 Africa: can tiered pricing and voluntary licencing assure universal access, health equity and  
560 fairness? *Globalization and Health*. 2017;13(1):73.
- 561 53. Boyer S, Baudoin M, Nishimwe ML, Santos M, Lemoine M, Maradan G, et al. Cost-  
562 utility analysis of four WHO-recommended sofosbuvir-based regimens for the treatment of  
563 chronic hepatitis C in sub-Saharan Africa. *BMC Health Services Research*. 2022;22(1):303.  
564

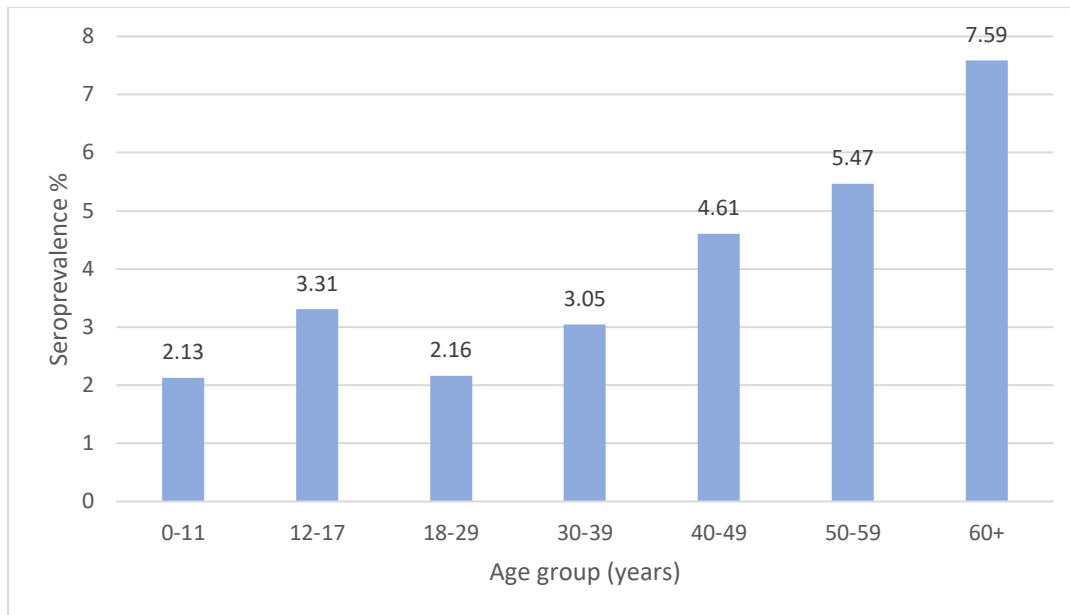

**Figure 1.** Hepatitis C antibody (Anti-HCV) seroprevalence based on laboratory-based rapid diagnostic tests (RDTs) by age group, 2016 – 2021. 0-11 years (n=1126), 12-17 years (n=906), 18-29 years (n=7075), 30-39 years (n=4132), 40-49 years (n=2668) 50-59 years (n=1736) 60+ years (n=2109).

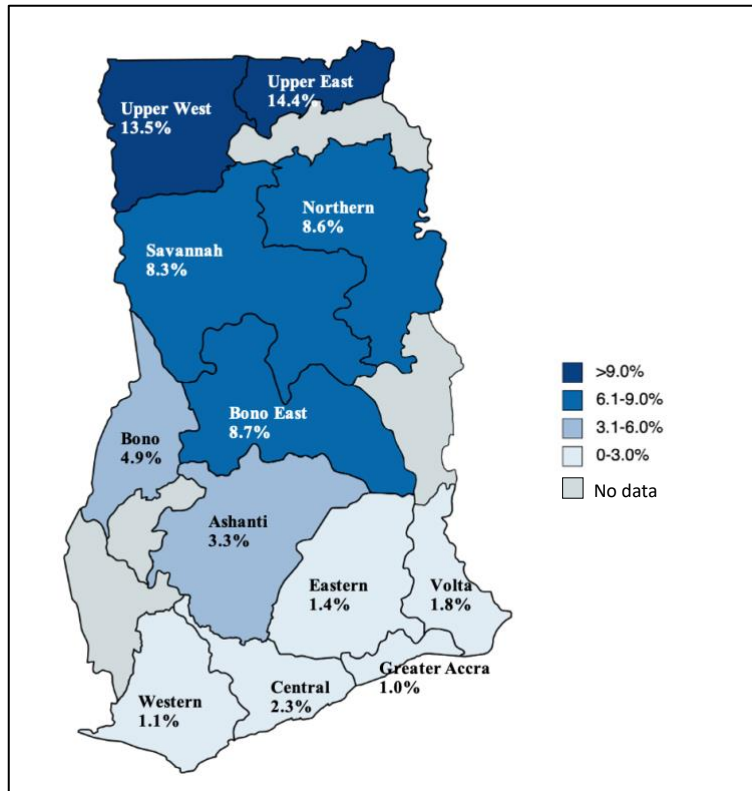

**Figure 2.** HCV seroprevalence based on laboratory-based RDT tests by region, 2016 – 2021

(all ages). Map Source: <https://www.mapchart.net/africa-detailed.html>



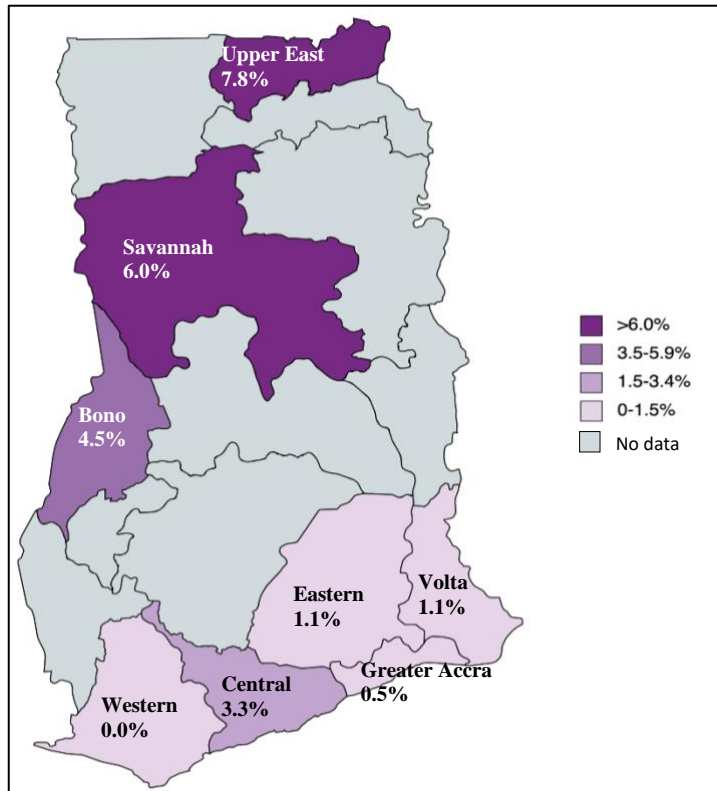

**Figure 3.** HCV seroprevalence in children and adolescents (<18 years) based on laboratory-based RDT tests by region, 2016 – 2021

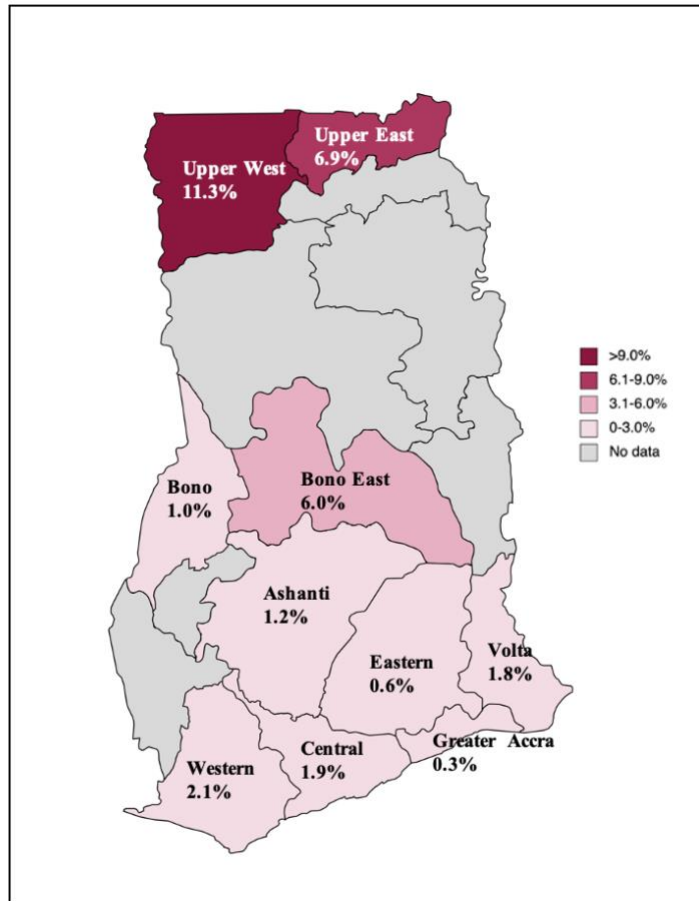

**Figure 4.** HCV seroprevalence among potential blood donors by region based on RDT testing 2016 – 2020
